# Supplementary material for: Genome-scale case-control analysis of CD4+ T-cell DNA methylation in juvenile idiopathic arthritis reveals potential targets involved in disease
Source: PubMed Central journal article supplement (PMC3536591; doi:10.1186/1868-7083-4-20), 2012-11-13
Supplement: 1868-7083-4-20-S1.pdf [file 1868-7083-4-20-S1.pdf]

Supplementary Figure 1: Correlation in betas between technical replicates.

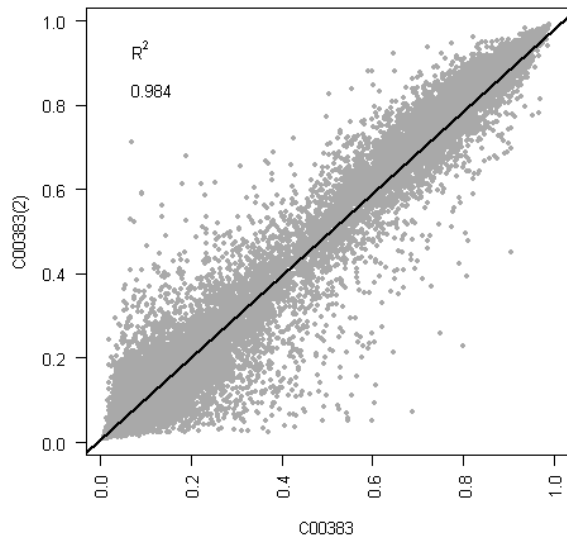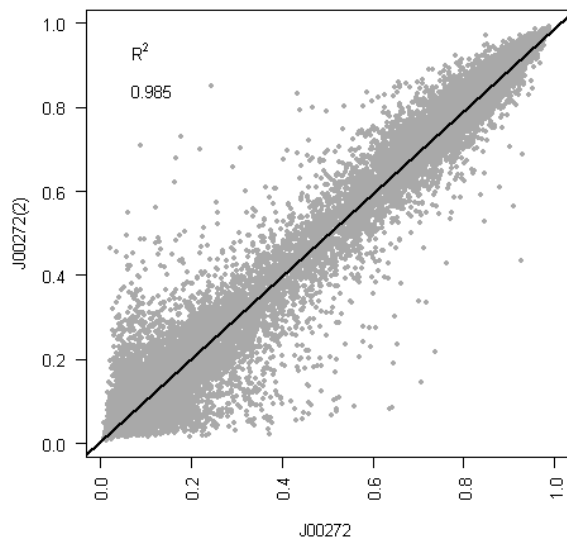

Supplementary Table 1: Alphabetical list of genes associated with probes identified as significantly differentially methylated between cases and controls.

| <b>GENE</b>     | <b>P.Value</b> | <b>adj.P.Value*</b> | <b>B</b>     | <b>Case relative to control</b> | <b>Median controls</b> | <b>Median cases</b> | <b>Difference</b> |
|-----------------|----------------|---------------------|--------------|---------------------------------|------------------------|---------------------|-------------------|
| <i>AKAP6</i>    | 0.000216306    | 0.083714351         | 0.699780073  | Higher                          | 0.819                  | 0.873               | 0.054             |
| <i>ALDOB</i>    | 6.63849E-05    | 0.068594965         | 1.727680478  | Higher                          | 0.715                  | 0.791               | 0.075             |
| <i>ANGEL2</i>   | 0.00027652     | 0.08962433          | 0.485163328  | Lower                           | 0.106                  | 0.082               | 0.024             |
| <i>APOE</i>     | 0.000126617    | 0.080318586         | 1.16679729   | Higher                          | 0.829                  | 0.861               | 0.032             |
| <i>ARFGEF1</i>  | 0.000490418    | 0.095936966         | -0.016377223 | Lower                           | 0.154                  | 0.110               | 0.045             |
| <i>ARHGDI1</i>  | 0.00022254     | 0.083714351         | 0.674965243  | Lower                           | 0.176                  | 0.124               | 0.052             |
| <i>ARMC1</i>    | 0.000331375    | 0.095936966         | 0.32686873   | Lower                           | 0.287                  | 0.205               | 0.081             |
| <i>ART4</i>     | 0.000480166    | 0.095936966         | 0.002131267  | Higher                          | 0.833                  | 0.864               | 0.032             |
| <i>ASB4</i>     | 0.000321289    | 0.095936966         | 0.353913712  | Higher                          | 0.803                  | 0.877               | 0.074             |
| <i>ATP2B1</i>   | 0.000505442    | 0.095936966         | -0.042816174 | Higher                          | 0.761                  | 0.824               | 0.063             |
| <i>ATP2B4</i>   | 0.000424007    | 0.095936966         | 0.111080164  | Lower                           | 0.437                  | 0.323               | 0.114             |
| <i>BAP1</i>     | 0.000433075    | 0.095936966         | 0.092548349  | Lower                           | 0.196                  | 0.157               | 0.038             |
| <i>BCDO2</i>    | 0.000103549    | 0.080072606         | 1.341785717  | Lower                           | 0.109                  | 0.086               | 0.024             |
| <i>BCKDHB</i>   | 0.000446559    | 0.095936966         | 0.065692583  | Lower                           | 0.200                  | 0.154               | 0.046             |
| <i>BLR1</i>     | 0.00039704     | 0.095936966         | 0.168623889  | Higher                          | 0.523                  | 0.600               | 0.078             |
| <i>C11orf49</i> | 0.000199824    | 0.083714351         | 0.768988887  | Lower                           | 0.179                  | 0.140               | 0.039             |
| <i>C12orf26</i> | 0.00012176     | 0.080318586         | 1.200846154  | Higher                          | 0.828                  | 0.867               | 0.039             |
| <i>C14orf8</i>  | 0.000127645    | 0.080318586         | 1.159756402  | Higher                          | 0.819                  | 0.865               | 0.046             |
| <i>C15orf15</i> | 0.000571684    | 0.099760877         | -0.150736065 | Lower                           | 0.221                  | 0.162               | 0.059             |
| <i>C18orf20</i> | 0.000395139    | 0.095936966         | 0.172826098  | Higher                          | 0.768                  | 0.860               | 0.093             |
| <i>C19orf18</i> | 0.000241853    | 0.08499455          | 0.602255319  | Higher                          | 0.783                  | 0.839               | 0.056             |
| <i>C6orf66</i>  | 0.000273175    | 0.08962433          | 0.495806312  | Lower                           | 0.128                  | 0.096               | 0.032             |
| <i>C7orf26</i>  | 0.000182942    | 0.083714351         | 0.84602795   | Higher                          | 0.686                  | 0.774               | 0.088             |
| <i>C8ORFK32</i> | 4.09043E-05    | 0.066658033         | 2.146409328  | Higher                          | 0.754                  | 0.794               | 0.040             |
| <i>CA9</i>      | 0.000472019    | 0.095936966         | 0.017122877  | Higher                          | 0.935                  | 0.947               | 0.012             |
| <i>CARD8</i>    | 0.000434989    | 0.095936966         | 0.088686498  | Lower                           | 0.135                  | 0.088               | 0.047             |
| <i>CASP8</i>    | 0.000348705    | 0.095936966         | 0.28226019   | Lower                           | 0.123                  | 0.095               | 0.029             |
| <i>CAV3</i>     | 0.00052839     | 0.098307717         | -0.081721183 | Higher                          | 0.919                  | 0.941               | 0.022             |

|                 |             |             |              |        |       |       |       |
|-----------------|-------------|-------------|--------------|--------|-------|-------|-------|
| <i>CBARA1</i>   | 0.000256968 | 0.089069361 | 0.549273653  | Lower  | 0.099 | 0.077 | 0.023 |
| <i>CBR4</i>     | 0.00049384  | 0.095936966 | -0.022468975 | Lower  | 0.106 | 0.089 | 0.017 |
| <i>CCDC23</i>   | 0.000508064 | 0.095936966 | -0.047349657 | Higher | 0.703 | 0.767 | 0.064 |
| <i>CCKAR</i>    | 0.000426096 | 0.095936966 | 0.106776349  | Higher | 0.887 | 0.907 | 0.020 |
| <i>CD53</i>     | 0.000476737 | 0.095936966 | 0.00840975   | Lower  | 0.171 | 0.136 | 0.035 |
| <i>CDS2</i>     | 0.000381132 | 0.095936966 | 0.204425604  | Higher | 0.626 | 0.704 | 0.078 |
| <i>CEACAM3</i>  | 0.000303238 | 0.094575911 | 0.404499515  | Higher | 0.746 | 0.815 | 0.069 |
| <i>CECR5</i>    | 0.000534147 | 0.098653532 | -0.091217994 | Higher | 0.661 | 0.730 | 0.069 |
| <i>CHD2</i>     | 0.000455031 | 0.095936966 | 0.049231605  | Lower  | 0.269 | 0.194 | 0.074 |
| <i>CLOCK</i>    | 0.000110759 | 0.080072606 | 1.28324222   | Higher | 0.822 | 0.881 | 0.059 |
| <i>COL17A1</i>  | 0.000270035 | 0.08962433  | 0.505915444  | Higher | 0.688 | 0.754 | 0.066 |
| <i>CPA4</i>     | 0.000122594 | 0.080318586 | 1.194903134  | Higher | 0.668 | 0.764 | 0.097 |
| <i>CPT2</i>     | 0.000233058 | 0.08499455  | 0.634620657  | Lower  | 0.148 | 0.110 | 0.038 |
| <i>CRB1</i>     | 0.000370595 | 0.095936966 | 0.228968726  | Higher | 0.885 | 0.921 | 0.036 |
| <i>CREG1</i>    | 0.000387024 | 0.095936966 | 0.190994396  | Lower  | 0.199 | 0.148 | 0.052 |
| <i>CYP4Z1</i>   | 0.000342478 | 0.095936966 | 0.298029077  | Higher | 0.546 | 0.604 | 0.058 |
| <i>DCTN3</i>    | 0.000387663 | 0.095936966 | 0.189549856  | Lower  | 0.126 | 0.098 | 0.028 |
| <i>DDX18</i>    | 0.00036628  | 0.095936966 | 0.239220057  | Lower  | 0.095 | 0.060 | 0.035 |
| <i>DEFB129</i>  | 0.000306494 | 0.094575911 | 0.395156672  | Higher | 0.684 | 0.755 | 0.071 |
| <i>DGKH</i>     | 6.38106E-05 | 0.068594965 | 1.761945858  | Lower  | 0.114 | 0.089 | 0.025 |
| <i>DNAH8</i>    | 8.11778E-05 | 0.07008303  | 1.553221977  | Higher | 0.847 | 0.886 | 0.039 |
| <i>DOK2</i>     | 0.000279821 | 0.08962433  | 0.474786482  | Lower  | 0.207 | 0.147 | 0.060 |
| <i>ESR2</i>     | 0.000206769 | 0.083714351 | 0.739158314  | Lower  | 0.104 | 0.084 | 0.020 |
| <i>FAM91A1</i>  | 7.12236E-05 | 0.068594965 | 1.66670021   | Higher | 0.692 | 0.755 | 0.063 |
| <i>FLJ10803</i> | 0.000393219 | 0.095936966 | 0.177092075  | Lower  | 0.256 | 0.203 | 0.053 |
| <i>FLJ20581</i> | 2.65243E-05 | 0.066658033 | 2.519401371  | Higher | 0.877 | 0.924 | 0.047 |
| <i>FLJ36004</i> | 4.64768E-05 | 0.066658033 | 2.036142035  | Higher | 0.738 | 0.823 | 0.085 |
| <i>FLJ40142</i> | 0.000221324 | 0.083714351 | 0.679751903  | Higher | 0.856 | 0.885 | 0.029 |
| <i>FLJ44674</i> | 0.000176729 | 0.083714351 | 0.87617517   | Higher | 0.814 | 0.858 | 0.043 |
| <i>FXC1</i>     | 0.000155055 | 0.083475942 | 0.990274457  | Higher | 0.743 | 0.812 | 0.069 |
| <i>GCET2</i>    | 5.88214E-06 | 0.066658033 | 3.802565003  | Lower  | 0.152 | 0.107 | 0.044 |
| <i>GLDN</i>     | 0.000430652 | 0.095936966 | 0.097461736  | Higher | 0.810 | 0.848 | 0.039 |
| <i>GP2</i>      | 0.000557386 | 0.09885596  | -0.128537656 | Higher | 0.733 | 0.783 | 0.050 |
| <i>GPD2</i>     | 0.000485084 | 0.095936966 | -0.00679635  | Higher | 0.713 | 0.778 | 0.065 |
| <i>GRM5</i>     | 3.35772E-05 | 0.066658033 | 2.316566914  | Higher | 0.780 | 0.846 | 0.066 |
| <i>GYPE</i>     | 1.71608E-05 | 0.066658033 | 2.892676923  | Higher | 0.688 | 0.781 | 0.093 |

|                  |             |             |              |        |       |       |       |
|------------------|-------------|-------------|--------------|--------|-------|-------|-------|
| <i>HINT1</i>     | 0.000486927 | 0.095936966 | -0.010117612 | Lower  | 0.171 | 0.131 | 0.040 |
| <i>HKR1</i>      | 0.000449784 | 0.095936966 | 0.059390999  | Lower  | 0.385 | 0.319 | 0.066 |
| <i>HNMT</i>      | 0.00055148  | 0.09885596  | -0.119202919 | Higher | 0.786 | 0.847 | 0.060 |
| <i>HRSP12</i>    | 0.0005018   | 0.095936966 | -0.036479154 | Lower  | 0.075 | 0.054 | 0.021 |
| <i>IL1RL1</i>    | 0.000484402 | 0.095936966 | -0.005563891 | Higher | 0.698 | 0.785 | 0.087 |
| <i>ILDR1</i>     | 0.000144504 | 0.081253071 | 1.051698105  | Higher | 0.855 | 0.889 | 0.034 |
| <i>ITGA6</i>     | 0.000506104 | 0.095936966 | -0.043962533 | Lower  | 0.144 | 0.114 | 0.030 |
| <i>KIAA0196</i>  | 0.00019609  | 0.083714351 | 0.785456614  | Higher | 0.772 | 0.849 | 0.077 |
| <i>KIAA0746</i>  | 0.00011047  | 0.080072606 | 1.285519142  | Lower  | 0.218 | 0.144 | 0.074 |
| <i>KRT10</i>     | 0.000517814 | 0.09705368  | -0.064004651 | Higher | 0.721 | 0.799 | 0.078 |
| <i>KRT25A</i>    | 0.00021474  | 0.083714351 | 0.706129139  | Higher | 0.833 | 0.885 | 0.052 |
| <i>LCN12</i>     | 0.000400885 | 0.095936966 | 0.160184714  | Higher | 0.907 | 0.922 | 0.015 |
| <i>LECT2</i>     | 0.000339955 | 0.095936966 | 0.304501457  | Higher | 0.755 | 0.823 | 0.068 |
| <i>LILRB4</i>    | 3.38863E-05 | 0.066658033 | 2.308676718  | Higher | 0.823 | 0.866 | 0.043 |
| <i>LOC253012</i> | 0.000540447 | 0.09885596  | -0.101492465 | Higher | 0.887 | 0.917 | 0.029 |
| <i>LOC90826</i>  | 1.21834E-05 | 0.066658033 | 3.185062762  | Lower  | 0.142 | 0.091 | 0.051 |
| <i>LONRF2</i>    | 0.000206915 | 0.083714351 | 0.738544738  | Higher | 0.647 | 0.711 | 0.065 |
| <i>LPO</i>       | 0.000202473 | 0.083714351 | 0.757490996  | Higher | 0.761 | 0.803 | 0.043 |
| <i>LRRC46</i>    | 0.00013367  | 0.080318586 | 1.119591765  | Higher | 0.653 | 0.753 | 0.101 |
| <i>LY9</i>       | 0.000109007 | 0.080072606 | 1.297116731  | Lower  | 0.153 | 0.117 | 0.036 |
| <i>MCM5</i>      | 0.000178767 | 0.083714351 | 0.866174012  | Higher | 0.927 | 0.947 | 0.021 |
| <i>MEF2C</i>     | 3.57177E-05 | 0.066658033 | 2.26332763   | Lower  | 0.075 | 0.056 | 0.019 |
| <i>MGC33839</i>  | 0.00035497  | 0.095936966 | 0.26667493   | Higher | 0.817 | 0.846 | 0.030 |
| <i>MGC40222</i>  | 0.000241018 | 0.08499455  | 0.605278938  | Higher | 0.865 | 0.896 | 0.031 |
| <i>MIA2</i>      | 0.000385632 | 0.095936966 | 0.194150061  | Higher | 0.749 | 0.821 | 0.072 |
| <i>MKS1</i>      | 0.000477723 | 0.095936966 | 0.00659922   | Higher | 0.691 | 0.807 | 0.116 |
| <i>MRPL28</i>    | 4.03006E-05 | 0.066658033 | 2.159236828  | Lower  | 0.875 | 0.685 | 0.190 |
| <i>MTRF1</i>     | 0.000439661 | 0.095936966 | 0.079329301  | Lower  | 0.178 | 0.131 | 0.046 |
| <i>NDST4</i>     | 0.000136283 | 0.080318586 | 1.102732092  | Higher | 0.825 | 0.861 | 0.036 |
| <i>NDUFV1</i>    | 0.00013654  | 0.080318586 | 1.101086123  | Higher | 0.871 | 0.904 | 0.033 |
| <i>NR1D1</i>     | 0.000208204 | 0.083714351 | 0.73311983   | Lower  | 0.219 | 0.160 | 0.059 |
| <i>NR1I2</i>     | 3.37791E-05 | 0.066658033 | 2.31140486   | Higher | 0.842 | 0.890 | 0.047 |
| <i>OTX2</i>      | 0.000452795 | 0.095936966 | 0.05354545   | Lower  | 0.243 | 0.197 | 0.046 |
| <i>PCYT2</i>     | 0.000271071 | 0.08962433  | 0.502567167  | Higher | 0.840 | 0.867 | 0.028 |
| <i>PDIA3</i>     | 0.000562592 | 0.09885596  | -0.136684845 | Lower  | 0.098 | 0.071 | 0.028 |
| <i>PLUNC</i>     | 5.42899E-05 | 0.068594965 | 1.901817742  | Higher | 0.798 | 0.859 | 0.061 |

|                |             |             |              |        |       |       |       |
|----------------|-------------|-------------|--------------|--------|-------|-------|-------|
| <i>PRH1</i>    | 2.83945E-05 | 0.066658033 | 2.46083631   | Higher | 0.813 | 0.875 | 0.062 |
| <i>PRH2</i>    | 0.000214014 | 0.083714351 | 0.70908677   | Higher | 0.808 | 0.841 | 0.033 |
| <i>PRPF8</i>   | 0.000498552 | 0.095936966 | -0.030789517 | Lower  | 0.131 | 0.103 | 0.028 |
| <i>PSMB5</i>   | 0.000241048 | 0.08499455  | 0.605169788  | Lower  | 0.135 | 0.097 | 0.038 |
| <i>PSMC5</i>   | 0.00019204  | 0.083714351 | 0.803672493  | Higher | 0.795 | 0.868 | 0.073 |
| <i>PYGM</i>    | 0.000346549 | 0.095936966 | 0.287687714  | Higher | 0.814 | 0.865 | 0.050 |
| <i>RAB32</i>   | 0.000440251 | 0.095936966 | 0.078155013  | Higher | 0.772 | 0.817 | 0.045 |
| <i>RAD51L3</i> | 4.58085E-05 | 0.066658033 | 2.048653596  | Lower  | 0.277 | 0.202 | 0.075 |
| <i>RBM18</i>   | 0.000213842 | 0.083714351 | 0.70978614   | Higher | 0.817 | 0.858 | 0.041 |
| <i>RBP3</i>    | 0.000166416 | 0.083714351 | 0.928619929  | Higher | 0.758 | 0.848 | 0.090 |
| <i>RETN</i>    | 0.00055767  | 0.09885596  | -0.12898426  | Higher | 0.712 | 0.791 | 0.079 |
| <i>Rgr</i>     | 4.12023E-06 | 0.066658033 | 4.102342388  | Higher | 0.894 | 0.931 | 0.037 |
| <i>RHEB</i>    | 0.000380226 | 0.095936966 | 0.206508863  | Lower  | 0.111 | 0.084 | 0.026 |
| <i>RPL34</i>   | 0.000224976 | 0.083714351 | 0.665454231  | Lower  | 0.161 | 0.117 | 0.043 |
| <i>RPS7</i>    | 0.000215054 | 0.083714351 | 0.704850796  | Higher | 0.076 | 0.103 | 0.028 |
| <i>SCML4</i>   | 0.000443466 | 0.095936966 | 0.071780197  | Higher | 0.831 | 0.863 | 0.031 |
| <i>SCOC</i>    | 4.74191E-05 | 0.066658033 | 2.018801341  | Higher | 0.765 | 0.825 | 0.060 |
| <i>SELL</i>    | 8.30926E-05 | 0.07008303  | 1.532987087  | Lower  | 0.168 | 0.118 | 0.050 |
| <i>SERINC3</i> | 0.000441112 | 0.095936966 | 0.076442643  | Lower  | 0.168 | 0.109 | 0.059 |
| <i>SLAMF7</i>  | 0.000560297 | 0.09885596  | -0.133102327 | Higher | 0.741 | 0.794 | 0.053 |
| <i>SLC13A3</i> | 2.34849E-05 | 0.066658033 | 2.623903316  | Higher | 0.712 | 0.784 | 0.073 |
| <i>SLC1A6</i>  | 0.000465285 | 0.095936966 | 0.029709668  | Higher | 0.812 | 0.871 | 0.059 |
| <i>SLC22A6</i> | 7.59064E-05 | 0.068594965 | 1.611478488  | Higher | 0.646 | 0.751 | 0.105 |
| <i>SLC4A1</i>  | 0.000130531 | 0.080318586 | 1.140289798  | Higher | 0.773 | 0.835 | 0.062 |
| <i>SPA17</i>   | 7.46543E-05 | 0.068594965 | 1.62590524   | Lower  | 0.194 | 0.140 | 0.054 |
| <i>SPATA16</i> | 9.95298E-05 | 0.080072606 | 1.376197121  | Higher | 0.844 | 0.904 | 0.060 |
| <i>SPOP</i>    | 6.32517E-05 | 0.068594965 | 1.769566229  | Lower  | 0.216 | 0.178 | 0.038 |
| <i>TAS2R60</i> | 0.000549771 | 0.09885596  | -0.116483034 | Higher | 0.807 | 0.849 | 0.042 |
| <i>TBC1D7</i>  | 0.000149293 | 0.082120933 | 1.023285487  | Higher | 0.777 | 0.834 | 0.057 |
| <i>TDRD1</i>   | 0.000139668 | 0.080318586 | 1.081357048  | Higher | 0.746 | 0.792 | 0.046 |
| <i>TEKT3</i>   | 5.67896E-05 | 0.068594965 | 1.862870314  | Higher | 0.303 | 0.409 | 0.106 |
| <i>TFB1M</i>   | 7.54951E-05 | 0.068594965 | 1.616191213  | Higher | 0.748 | 0.821 | 0.073 |
| <i>THEM5</i>   | 0.000403019 | 0.095936966 | 0.155537503  | Higher | 0.744 | 0.794 | 0.050 |
| <i>TIMM8B</i>  | 1.56402E-05 | 0.066658033 | 2.971983671  | Lower  | 0.124 | 0.079 | 0.045 |
| <i>TLR6</i>    | 0.000188279 | 0.083714351 | 0.820934811  | Higher | 0.834 | 0.876 | 0.042 |
| <i>TMCO5</i>   | 0.000322289 | 0.095936966 | 0.349566165  | Higher | 0.774 | 0.847 | 0.074 |

|                |             |             |             |        |       |       |       |
|----------------|-------------|-------------|-------------|--------|-------|-------|-------|
| <i>TP53BP1</i> | 0.000272418 | 0.08962433  | 0.498233089 | Lower  | 0.089 | 0.061 | 0.028 |
| <i>TRAM1L1</i> | 4.50755E-05 | 0.066658033 | 2.062585417 | Lower  | 0.224 | 0.142 | 0.083 |
| <i>TRPV5</i>   | 0.000504023 | 0.095936966 | -0.04035213 | Higher | 0.879 | 0.920 | 0.041 |
| <i>TSC22D2</i> | 0.0003061   | 0.094575911 | 0.396282629 | Lower  | 0.037 | 0.031 | 0.006 |
| <i>YWHAB</i>   | 7.39695E-05 | 0.068594965 | 1.633897346 | Higher | 0.870 | 0.910 | 0.040 |
| <i>ZNF217</i>  | 0.000458685 | 0.095936966 | 0.042224996 | Lower  | 0.204 | 0.114 | 0.090 |
| <i>ZNF306</i>  | 0.000444446 | 0.095936966 | 0.069848113 | Lower  | 0.190 | 0.147 | 0.043 |
| <i>ZNF536</i>  | 0.000427091 | 0.095936966 | 0.104734155 | Higher | 0.605 | 0.677 | 0.072 |
| <i>ZNF678</i>  | 0.000166443 | 0.083714351 | 0.928480869 | Higher | 0.792 | 0.855 | 0.063 |

\* P value following adjustment for false discovery rate (FDR)

B = log-odds that the probe is differentially methylated



Supplementary Figure 3: Location of *MRPL28* CpG dinucleotides measured by the Sequenom Epityper assay. Assay unit denoted in red includes the significant HM27 CpG probe site.

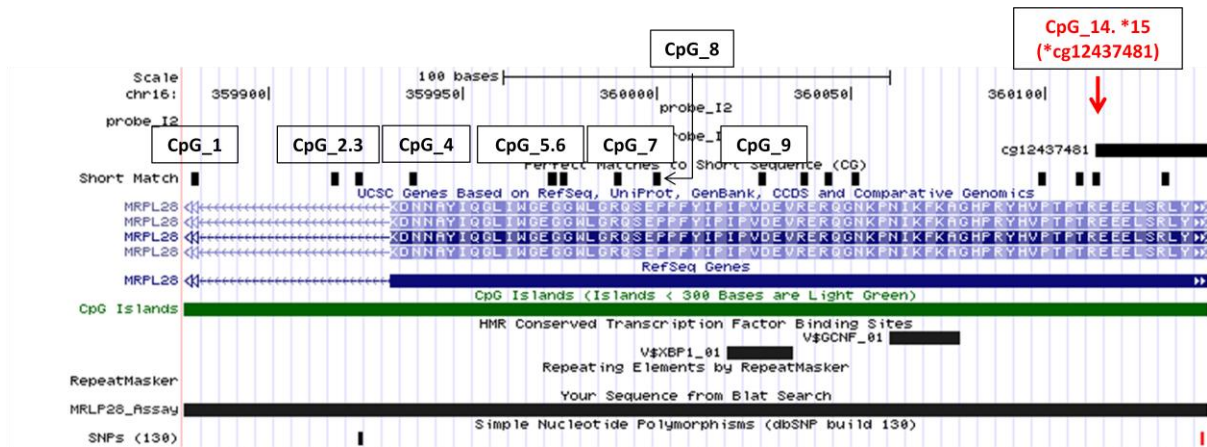



Supplementary Figure 4: Location of *IL32* CpG dinucleotides measured by the Sequenom Epityper assay. CpGs were measured using two separate assays, denoted here as 'IL32\_a' and 'IL32\_b'. Assay unit denoted in red and asterisked includes the significant HM27 CpG probe site.

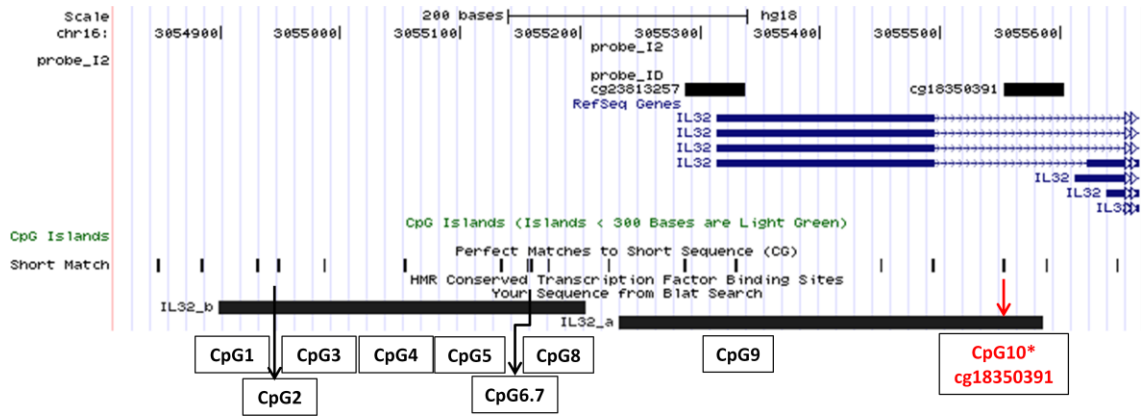

Supplementary Table 2: Basic characteristics of the age- and sex-matched case-control pairs. Cases of pairs in **bold** were exposed to MTX prior to biospecimen collection.

| Case-control pair # | Age at recruitment | Age at diagnosis* | Sex      | JIA subtype           |
|---------------------|--------------------|-------------------|----------|-----------------------|
| Discovery (array):  |                    |                   |          |                       |
| <b>01</b>           | <b>1</b>           | <b>1</b>          | <b>F</b> | <b>polyarticular</b>  |
| 02                  | 2                  | 2                 | F        | oligoarticular        |
| 03                  | 5                  | 5                 | F        | polyarticular         |
| <b>04</b>           | <b>6</b>           | <b>2</b>          | <b>F</b> | <b>oligoarticular</b> |
| 05                  | 7                  | 6                 | F        | oligoarticular        |
| 06                  | 9                  | 9                 | F        | oligoarticular        |
| 07                  | 11                 | 11                | F        | oligoarticular        |
| 08                  | 12                 | 11                | M        | oligoarticular        |
| 09                  | 12                 | 12                | M        | oligoarticular        |
| <b>10</b>           | <b>12</b>          | <b>7</b>          | <b>F</b> | <b>polyarticular</b>  |
| 11                  | 11                 | 11                | M        | polyarticular         |
| 12                  | 12                 | 11                | F        | oligoarticular        |
| <b>13</b>           | <b>13</b>          | <b>13</b>         | <b>F</b> | <b>oligoarticular</b> |
| 14                  | 14                 | 14                | M        | oligoarticular        |
| Replication:        |                    |                   |          |                       |
| 15                  | 1                  | 1                 | M        | oligoarticular        |
| 16                  | 3                  | 3                 | F        | oligoarticular        |
| 17                  | 6                  | 6                 | F        | oligoarticular        |
| 18                  | 8                  | 8                 | F        | oligoarticular        |
| <b>19</b>           | <b>11</b>          | <b>10</b>         | <b>M</b> | <b>polyarticular</b>  |
| 20                  | 12                 | 12                | F        | oligoarticular        |
| 21                  | 13                 | 13                | F        | oligoarticular        |
| 22                  | 6                  | 6                 | F        | oligoarticular        |
| 23                  | 10                 | 10                | M        | oligoarticular        |
| 24                  | 11                 | 11                | F        | polyarticular         |
| 25                  | 2                  | 2                 | F        | oligoarticular        |
| 26                  | 3                  | 3                 | F        | polyarticular         |

\* Case only

Supplementary Table 3: Beta values for *MRPL28* Sequenom EpiTYPER assay units, in comparison to beta values from the significantly differentially methylated *MRPL28* HM27 array probe. The array probe could not be captured in isolation by the Sequenom assay, but forms part of the assay unit labeled CpG\_14.15. N/A = not assayed. “-” = missing data (did not pass quality control).

| Pair #               | sample type | Sequenom assay unit |         |       |         |       |       |       |           | HM27 array probe |
|----------------------|-------------|---------------------|---------|-------|---------|-------|-------|-------|-----------|------------------|
|                      |             | CpG_1               | CpG_2.3 | CpG_4 | CpG_5.6 | CpG_7 | CpG_8 | CpG_9 | CpG_14.15 | cg12437481       |
| <i>'array' pairs</i> |             |                     |         |       |         |       |       |       |           |                  |
| 1                    | case        | 0.44                | 0.95    | 0.65  | 0.95    | 0.90  | 0.96  | 0.61  | 0.81      | 0.79             |
|                      | control     | 0.46                | 0.95    | 0.46  | 0.95    | 0.90  | 0.85  | 0.43  | 0.73      | 0.66             |
| 2                    | case        | 0.43                | 0.96    | 0.76  | 0.95    | 0.91  | 0.90  | 0.67  | 0.82      | 0.88             |
|                      | control     | 0.47                | 0.96    | 0.86  | 0.96    | 0.95  | 0.97  | 0.71  | 0.90      | 0.91             |
| 3                    | case        | 0.51                | 0.93    | 0.35  | 0.64    | 0.53  | 0.49  | 0.16  | 0.38      | 0.34             |
|                      | control     | 0.43                | 0.97    | 0.73  | 0.95    | 0.94  | 0.96  | 0.61  | 0.82      | 0.84             |
| 4                    | case        | 0.49                | 0.93    | 0.59  | 0.92    | 0.84  | 0.91  | 0.57  | 0.68      | 0.58             |
|                      | control     | 0.45                | 0.93    | 0.73  | 0.92    | 0.92  | 0.91  | 0.61  | 0.82      | 0.77             |
| 6                    | case        | 0.48                | 0.93    | 0.56  | 0.78    | 0.71  | 0.76  | 0.51  | 0.62      | 0.42             |
|                      | control     | 0.47                | 0.96    | 0.82  | 0.96    | 0.95  | 0.96  | 0.70  | 0.92      | 0.90             |
| 7                    | case        | 0.48                | 0.93    | 0.56  | 0.94    | 0.94  | 0.93  | 0.58  | 0.73      | 0.51             |
|                      | control     | 0.50                | 0.96    | 0.79  | 0.96    | 0.94  | 0.98  | 0.63  | 0.91      | 0.87             |
| 8                    | case        | 0.45                | 0.96    | 0.77  | 0.94    | 0.87  | 0.90  | 0.58  | 0.78      | 0.80             |
|                      | control     | 0.47                | 0.97    | 0.84  | 0.94    | 0.91  | 0.94  | 0.70  | 0.91      | 0.93             |
| 9                    | case        | 0.48                | 0.95    | 0.57  | 0.77    | 0.68  | 0.69  | 0.57  | 0.58      | 0.42             |
|                      | control     | 0.44                | 0.95    | 0.74  | 0.95    | 0.91  | 0.93  | 0.61  | 0.76      | 0.81             |
| 11                   | case        | 0.49                | 0.94    | 0.76  | 0.97    | 0.89  | 0.95  | 0.67  | 0.76      | 0.77             |
|                      | control     | 0.46                | 0.92    | 0.69  | 0.93    | 0.88  | 0.90  | 0.63  | 0.68      | 0.67             |
| 12                   | case        | 0.51                | 0.95    | 0.74  | 0.97    | 0.85  | 0.93  | 0.67  | 0.79      | 0.74             |
|                      | control     | 0.47                | 0.93    | 0.62  | 0.94    | 0.94  | 0.93  | 0.70  | 0.71      | 0.65             |
| 13                   | case        | 0.44                | 0.91    | 0.57  | 0.93    | 0.86  | 0.88  | 0.56  | 0.71      | 0.64             |
|                      | control     | 0.50                | 0.96    | 0.84  | 0.98    | 0.95  | 0.97  | 0.64  | 0.92      | 0.88             |
| 14                   | case        | 0.45                | 0.94    | 0.80  | 0.95    | 0.92  | 0.94  | 0.74  | 0.81      | 0.71             |

|                                   |         |              |              |             |              |             |             |             |             |             |
|-----------------------------------|---------|--------------|--------------|-------------|--------------|-------------|-------------|-------------|-------------|-------------|
|                                   | control | 0.45         | 0.96         | 0.82        | 0.96         | 0.93        | 0.95        | 0.82        | 0.88        | 0.89        |
| <i>'array' pair means (SE)</i>    |         |              |              |             |              |             |             |             |             |             |
|                                   | case    | 0.47 (0.01)  | 0.94 (0.004) | 0.64 (0.04) | 0.89 (0.03)  | 0.83 (0.04) | 0.85 (0.04) | 0.57 (0.04) | 0.71 (0.04) | 0.63 (0.05) |
|                                   | control | 0.46 (0.01)  | 0.95 (0.004) | 0.75 (0.03) | 0.95 (0.005) | 0.93 (0.01) | 0.94 (0.01) | 0.65 (0.03) | 0.83 (0.03) | 0.82 (0.03) |
| <i>'sequenom' pairs</i>           |         |              |              |             |              |             |             |             |             |             |
| 15                                | case    | 0.44         | 0.96         | -           | -            | -           | -           | -           | -           | N/A         |
|                                   | control | 0.43         | 0.98         | 0.78        | 0.94         | 0.87        | 0.85        | 0.68        | 0.83        | N/A         |
| 16                                | case    | 0.42         | 0.93         | 0.65        | 0.95         | 0.81        | 0.87        | 0.66        | 0.73        | N/A         |
|                                   | control | 0.43         | -            | 0.93        | 0.99         | 0.94        | -           | 0.60        | -           | N/A         |
| 17                                | case    | 0.43         | 0.96         | 0.71        | 0.96         | 0.86        | 0.88        | -           | 0.83        | N/A         |
|                                   | control | 0.43         | 0.92         | 0.78        | 0.95         | 0.86        | 0.98        | -           | 0.82        | N/A         |
| 18                                | case    | 0.41         | 0.92         | -           | -            | -           | 0.56        | -           | -           | N/A         |
|                                   | control | 0.45         | 0.95         | -           | -            | -           | -           | -           | -           | N/A         |
| 19                                | case    | 0.44         | 0.93         | -           | 0.9          | 0.8         | 0.79        | 0.57        | 0.73        | N/A         |
|                                   | control | 0.44         | 0.97         | 0.83        | 0.95         | 0.91        | 0.93        | 0.79        | 0.90        | N/A         |
| 20                                | case    | 0.43         | 0.96         | -           | 0.75         | 0.59        | 0.53        | 0.38        | 0.64        | N/A         |
|                                   | control | 0.44         | 0.98         | 0.87        | 0.96         | 0.94        | 0.98        | 0.77        | 0.92        | N/A         |
| 21                                | case    | 0.47         | 0.96         | 0.74        | 0.95         | 0.93        | 0.95        | 0.79        | 0.86        | N/A         |
|                                   | control | 0.46         | 0.95         | 0.77        | 0.95         | 0.86        | 0.93        | 0.71        | 0.77        | N/A         |
| 22                                | case    | 0.43         | 0.94         | 0.66        | 0.93         | 0.80        | 0.92        | 0.54        | 0.72        | N/A         |
|                                   | control | 0.43         | 0.96         | 0.76        | 0.97         | 0.93        | 0.95        | 0.81        | 0.86        | N/A         |
| 23                                | case    | 0.42         | 0.92         | 0.36        | 0.74         | 0.61        | 0.61        | 0.38        | 0.44        | N/A         |
|                                   | control | 0.44         | 0.96         | 0.73        | 0.95         | 0.87        | 0.88        | 0.66        | 0.78        | N/A         |
| 24                                | case    | 0.46         | 0.96         | 0.88        | 0.97         | 0.93        | 0.94        | 0.86        | 0.91        | N/A         |
|                                   | control | 0.45         | 0.96         | 0.75        | 0.98         | 1.0         | 0.99        | 0.45        | 0.92        | N/A         |
| 25                                | case    | 0.42         | 0.98         | 0.55        | 0.73         | 0.69        | 0.61        | 0.57        | 0.54        | N/A         |
|                                   | control | 0.43         | 0.99         | 0.92        | 0.97         | 0.96        | 0.99        | -           | -           | N/A         |
| 26                                | case    | 0.45         | 0.97         | 0.84        | 0.97         | 0.91        | 0.97        | 0.87        | -           | N/A         |
|                                   | control | 0.41         | 0.94         | 0.78        | 0.82         | 0.75        | 0.86        | -           | -           | N/A         |
| <i>'sequenom' pair means (SE)</i> |         |              |              |             |              |             |             |             |             |             |
|                                   | case    | 0.43 (0.01)  | 0.95 (0.01)  | 0.64 (0.07) | 0.88 (0.05)  | 0.79 (0.05) | 0.82 (0.07) | 0.63 (0.07) | 0.70 (0.07) | N/A         |
|                                   | control | 0.44 (0.004) | 0.96 (0.004) | 0.78 (0.02) | 0.96 (0.004) | 0.91 (0.02) | 0.93 (0.02) | 0.70 (0.05) | 0.85 (0.02) | N/A         |

Supplementary Table 4: Beta values for *IL32* Sequenom EpiTYPER assay units, in comparison to beta values from the significantly differentially methylated *IL32* HM27 array probe. The array probe was captured by the Sequenom assay unit labeled CpG\_10. N/A = not assayed. “-“ = missing data (did not pass quality control).

| Pair #                         | sample type | Sequenom assay unit |             |             |             |             |             |             |             |             | HM27 array probe<br>cg18350391 |
|--------------------------------|-------------|---------------------|-------------|-------------|-------------|-------------|-------------|-------------|-------------|-------------|--------------------------------|
|                                |             | CpG_1               | CpG_2       | CpG_3       | CpG_4       | CpG_5       | CpG_6.7     | CpG_8       | CpG_9       | CpG_10      |                                |
| <i>'array' pairs</i>           |             |                     |             |             |             |             |             |             |             |             |                                |
| 2                              | case        | 0.94                | 0.89        | 0.69        | 0.87        | 0.67        | 0.86        | 0.85        | 0.20        | 0.12        | 0.31                           |
|                                | control     | 0.85                | 0.88        | 0.49        | 0.87        | 0.63        | 0.77        | 0.78        | 0.27        | 0.13        | 0.48                           |
| 3                              | case        | 0.86                | 0.90        | 0.96        | 0.84        | 0.47        | 0.70        | 0.71        | 0.04        | 0.03        | 0.07                           |
|                                | control     | -                   | -           | -           | -           | -           | -           | -           | -           | -           | 0.37                           |
| 5                              | case        | 0.95                | 0.91        | 0.96        | 0.84        | 0.72        | 0.87        | 0.85        | 0.39        | 0.22        | 0.41                           |
|                                | control     | 0.95                | 0.89        | 0.95        | 0.89        | 0.83        | 0.83        | 0.87        | 0.55        | 0.37        | 0.54                           |
| 6                              | case        | 0.88                | 0.89        | 0.5         | 0.85        | 0.65        | 0.80        | 0.80        | 0.23        | 0.09        | 0.29                           |
|                                | control     | 0.93                | 0.90        | 0.96        | 0.87        | 0.81        | 0.89        | 0.88        | 0.55        | 0.31        | 0.33                           |
| 7                              | case        | 0.90                | 0.87        | 0.66        | 0.83        | 0.60        | 0.82        | 0.77        | 0.18        | 0.04        | 0.24                           |
|                                | control     | 0.87                | 0.87        | 0.94        | 0.78        | 0.60        | 0.81        | 0.79        | 0.39        | 0.19        | 0.33                           |
| 8                              | case        | 0.91                | 0.89        | 0.66        | 0.82        | 0.72        | 0.83        | 0.79        | 0.43        | 0.25        | 0.49                           |
|                                | control     | 0.87                | 0.89        | 0.97        | 0.86        | 0.74        | 0.92        | 0.91        | 0.59        | 0.57        | 0.47                           |
| 9                              | case        | 0.86                | 0.85        | 0.68        | 0.76        | 0.59        | 0.79        | 0.76        | 0.28        | 0.18        | 0.30                           |
|                                | control     | 0.91                | 0.93        | 0.65        | 0.85        | 0.62        | 0.82        | 0.76        | -           | 0.18        | 0.47                           |
| 11                             | case        | 0.81                | 0.88        | 0.67        | 0.79        | 0.47        | 0.74        | 0.69        | 0.13        | 0.10        | 0.22                           |
|                                | control     | 0.69                | 0.82        | 0.63        | 0.80        | 0.42        | 0.74        | 0.63        | 0.12        | 0.06        | 0.14                           |
| 12                             | case        | 0.85                | 0.83        | 0.53        | 0.78        | 0.46        | 0.87        | 0.88        | 0.27        | 0.08        | 0.37                           |
|                                | control     | 0.71                | 0.81        | 0.49        | 0.72        | 0.35        | 0.63        | 0.60        | 0.07        | 0.03        | 0.19                           |
| 14                             | case        | 0.91                | 0.90        | 0.54        | 0.87        | 0.69        | 0.81        | 0.83        | 0.17        | 0.07        | 0.24                           |
|                                | control     | 0.80                | 0.81        | 0.90        | 0.73        | 0.50        | 0.72        | 0.69        | 0.43        | 0.27        | 0.44                           |
| <i>'array' pair means (SE)</i> |             |                     |             |             |             |             |             |             |             |             |                                |
|                                | case        | 0.88 (0.02)         | 0.88 (0.01) | 0.68 (0.05) | 0.82 (0.01) | 0.60 (0.03) | 0.81 (0.02) | 0.79 (0.02) | 0.23 (0.04) | 0.12 (0.02) | 0.29 (0.04)                    |
|                                | control     | 0.83 (0.03)         | 0.86 (0.01) | 0.79 (0.08) | 0.81 (0.02) | 0.61 (0.06) | 0.79 (0.03) | 0.77 (0.04) | 0.37 (0.07) | 0.24 (0.06) | 0.37 (0.05)                    |

|                                   |         |             |             |             |             |             |             |             |             |             |     |
|-----------------------------------|---------|-------------|-------------|-------------|-------------|-------------|-------------|-------------|-------------|-------------|-----|
| <i>'sequenom' pairs</i>           |         |             |             |             |             |             |             |             |             |             |     |
| 15                                | case    | 0.92        | 0.9         | 0.96        | 0.88        | 0.69        | 0.86        | 0.78        | 0.29        | 0.11        | N/A |
|                                   | control | 0.98        | 0.9         | 0.19        | 0.83        | 0.79        | 0.90        | 0.88        | 0.40        | 0.14        | N/A |
| 16                                | case    | 0.94        | 0.86        | 0.67        | 0.82        | 0.64        | 0.83        | 0.80        | 0.13        | 0.05        | N/A |
|                                   | control | 0.89        | 0.90        | 0.73        | 0.87        | 0.63        | 0.87        | 0.84        | -           | 0.02        | N/A |
| 17                                | case    | 0.82        | 0.82        | 0.68        | 0.77        | 0.52        | 0.77        | 0.74        | 0.20        | 0.08        | N/A |
|                                   | control | 1           | 0.92        | 0.99        | -           | -           | 0.97        | 0.81        | 0.21        | 0           | N/A |
| 18                                | case    | -           | -           | -           | -           | -           | -           | -           | -           | -           | N/A |
|                                   | control | 0.90        | 0.88        | 0.49        | 0.86        | 0.78        | 0.87        | 0.84        | 0.21        | 0.06        | N/A |
| 20                                | case    | 0.83        | 0.94        | 0.33        | -           | 0.35        | 0.72        | 0.59        | 0.07        | 0           | N/A |
|                                   | control | 0.90        | 0.84        | 0.67        | 0.84        | 0.69        | 0.77        | -           | 0.37        | 0.16        | N/A |
| 21                                | case    | 0.77        | 0.83        | 0.37        | 0.79        | 0.40        | 0.67        | 0.70        | 0.12        | 0.02        | N/A |
|                                   | control | 0.82        | 0.83        | 0.91        | 0.73        | 0.48        | 0.72        | 0.67        | 0.22        | 0.12        | N/A |
| 22                                | case    | 0.94        | 0.89        | 0.98        | 0.84        | 0.81        | 0.94        | 0.92        | 0.51        | 0.34        | N/A |
|                                   | control | 0.86        | 0.91        | 0.53        | 0.84        | 0.67        | 0.86        | 0.80        | 0.19        | 0.07        | N/A |
| 23                                | case    | 0.81        | 0.84        | 0.67        | 0.83        | -           | 0.70        | 0.67        | 0.05        | 0.04        | N/A |
|                                   | control | 0.80        | 0.82        | 0.69        | 0.72        | 0.51        | 0.71        | 0.71        | 0.16        | 0.08        | N/A |
| 24                                | case    | 0.87        | 0.87        | 0.33        | 0.80        | 0.64        | 0.82        | 0.74        | 0.35        | 0.2         | N/A |
|                                   | control | 0.81        | 0.91        | 0.48        | 0.61        | -           | 0.73        | 0.65        | 0.43        | 0.12        | N/A |
| 25                                | case    | 0.81        | 0.89        | 0.98        | 0.82        | 0.46        | 0.73        | 0.74        | 0.03        | 0.03        | N/A |
|                                   | control | 0.99        | 0.98        | 0.99        | 0.88        | 0.74        | 0.92        | 0.92        | 0.62        | 0.36        | N/A |
| 26                                | case    | -           | -           | -           | -           | -           | -           | -           | 0.52        | 0.19        | N/A |
|                                   | control | 0.87        | -           | 0.66        | 0.76        | 0.68        | 0.87        | 0.75        | 0.14        | 0.02        | N/A |
| <i>'sequenom' pair means (SE)</i> |         |             |             |             |             |             |             |             |             |             |     |
|                                   | case    | 0.87 (0.03) | 0.87 (0.01) | 0.71 (0.11) | 0.81 (0.01) | 0.59 (0.05) | 0.80 (0.03) | 0.77 (0.03) | 0.23 (0.06) | 0.12 (0.04) | N/A |
|                                   | control | 0.89 (0.03) | 0.89 (0.02) | 0.63 (0.12) | 0.81 (0.03) | 0.66 (0.06) | 0.83 (0.04) | 0.80 (0.04) | 0.30 (0.07) | 0.14 (0.05) | N/A |
